# Supplementary material
Source: bioRxiv or medRxiv preprint supplement (https://medrxiv.org/highwire/filestream/80136/field_highwire_adjunct_files/4/2020.05.06.20089573-5.pdf)

**Supplementary Figure 5.** These column charts show the distribution of patients by the duration from the first of the consecutive negative anal swab tests to the first positive retest during strict post-discharge quarantine. A) All COVID-19 patients with recurrence of anal swab PCR positivity. B) The subset of anal swab PCR positive group (N=14) with IgM and IgG antibody tests performed at the time of the first discharge. All patients with anal swab positivity were IgG positive.

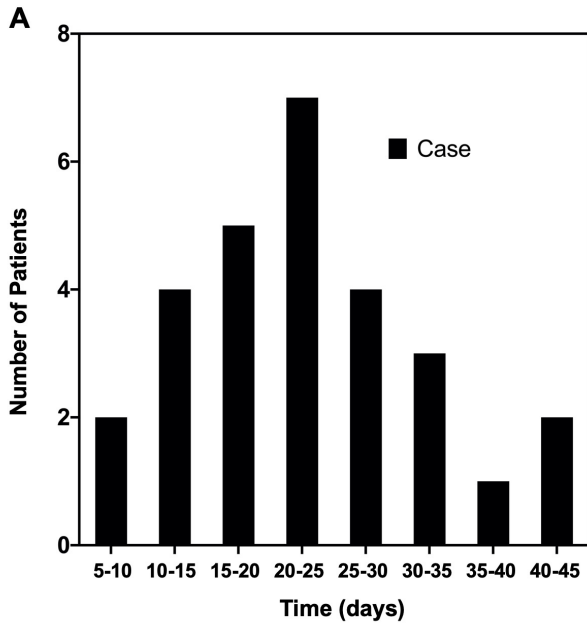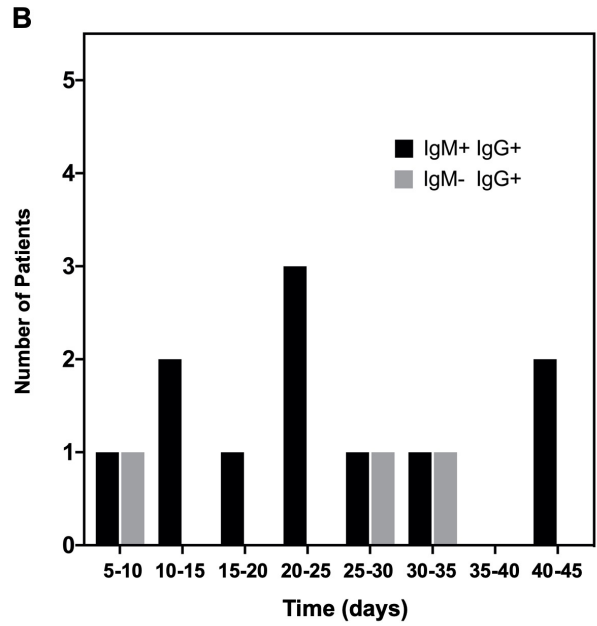

Supplement: Supplementary file [file 2020.05.06.20089573-5.pdf]
